# Supplementary material
Source: Research Square preprint supplement (doi:10.21203/rs.3.rs-9827907/v1)
Supplement: Supplementary file 1 [file ad79851a9309a4a7905bc9f8.pdf]

# Supplementary Information: Reliability-Aware Compact AI Framework for Industrial Predictive Maintenance Under Deployment Constraints

Aman Sharma<sup>1\*</sup>

<sup>1\*</sup>Department of Computing Technology, Swinburne University of Technology, Melbourne, VIC, Australia.

Corresponding author(s). E-mail(s): [amansharma@swinburne.edu.au](mailto:amansharma@swinburne.edu.au);

## Abstract

This supplementary file supports the reliability-aware compact artificial intelligence (AI) framework for predictive maintenance (PdM) by documenting pair-level Integrated Gradients (IG) artefacts, validation-status records, supplementary tables, data-array references, and visual evidence. It does not introduce new experiments, retraining runs, or additional metric claims. Its purpose is to make the main-paper framework comparison transparent, traceable, and auditable for reviewers.

**Keywords:** predictive maintenance, supplementary material, validation, Integrated Gradients, reliability-aware artificial intelligence

## S1 Relationship to the main manuscript

The main manuscript reports a nine-family reliability-aware framework across AI4I and MetroPT. This supplementary file provides the detailed artefact layer behind that framework. It follows the same evidence logic as the revised Methodology and Results sections: model-registry scope, train/test evidence boundaries, reliability and perturbation records, IG summaries, and supplementary artefact traceability.

The supplementary material should be read as an audit companion. The main paper explains the framework-level interpretation, including why strong clean-condition ranking is not sufficient without calibration, latency, perturbation, and attribution evidence. This file retains the pair-level tables, figures, validation records, and data-array references that allow reviewers to inspect the basis for that interpretation.

***Reproducibility-package boundary.***

The accompanying Code Ocean capsule for this reliability-aware compact AI framework study is available at <https://codeocean.com/capsule/8855575/tree/v1>. The capsule is specific to the broader nine-family reliability-aware compact AI framework, although it shares some utility code and validation conventions with the companion NoiseGate project because both studies use the same public datasets and reproducibility infrastructure. The capsule is intended as a reviewer-facing reproducibility and source-code validation package. The default execution performs a lightweight smoke test that verifies environment setup, data-loading interfaces, model construction, training-loop execution, and result-export pathways. Complete manuscript-level results, figures, tables, and supplementary artefacts are reported in the manuscript and Supplementary Information. Full dataset-dependent reruns require restoring the complete public datasets according to the documented paths and disabling smoke-test mode. This capsule supports transparent review but should not be interpreted as a guarantee that every final figure and table is regenerated by the default run.

## **S2 Reviewer map**

## **S3 Supplementary methodology notes**

The reliability-aware framework was designed to compare compact model families under a shared evidence boundary. The supplementary material clarifies this boundary by retaining the pair-level IG tables and validation records rather than relying only on aggregate plots. This is important because the main paper argues that model quality is multi-dimensional: a model can rank well under clean conditions and still become less reliable under feature dropout or stronger perturbation.

The supplementary evidence also clarifies the role of the physics-guided gated variants. The magnitude-aware gate is a lightweight inductive-bias mechanism rather than a full physics-constrained solver. The pair-level tables and figures therefore support a careful interpretation: gated variants can be competitive and inspectable, but their value depends on the dataset, metric, and perturbation condition.

## **S4 Rendered supplementary tables**

The following tables are rendered from the supplementary CSV sources retained in the clean release. They provide pair-level IG values and validation-status information that support the condensed attribution and reliability discussion in the main manuscript.

**Table S1** How the supplementary material supports the reliability-aware framework manuscript.

| Main-manuscript topic                   | Supplementary support                                                      | Interpretation boundary                                                                   |
|-----------------------------------------|----------------------------------------------------------------------------|-------------------------------------------------------------------------------------------|
| Nine-model framework scope              | Validation-status and pair-level supplementary tables                      | Confirms the validated model-dataset pairs without adding unreported models.              |
| IG method                               | Pair-level attribution tables, visual artefacts, and data-array references | Supports attribution inspection, but does not establish causal physical mechanisms.       |
| Reliability and perturbation discussion | Validation and repair-status logs                                          | Helps distinguish clean-condition evidence from perturbation and fallback-local evidence. |
| Gated and ablation interpretation       | Pair-level model summaries and visual artefacts                            | Supports cautious discussion of physics-guided gated and ablation variants.               |
| Reproducibility package                 | Manifest, smoke-test, validation, and data-array listings                  | Documents the artefact package available to reviewers.                                    |

**Table S2** Supplementary table S1: pair-level IG attribution

| feat                  | mean_abs_ig | mean_signed_ig |
|-----------------------|-------------|----------------|
| torque_nm             | 0.1512      | 0.1430         |
| type_M                | 0.1328      | -0.1328        |
| phys_power_proxy      | 0.1156      | 0.1148         |
| tool_wear_min         | 0.0386      | 0.0311         |
| process_temperature_k | 0.0351      | 0.0122         |
| phys_thermo_mech      | 0.0338      | 0.0313         |
| type_L                | 0.0331      | -0.0292        |
| air_temperature_k     | 0.0298      | -0.0251        |
| rotational_speed_rpm  | 0.0263      | -0.0255        |
| phys_delta_temp       | 0.0122      | 0.0122         |

Rendered from the copied supplementary CSV source retained with this project.

**Table S3** Supplementary table S2: pair-level IG attribution

| feat            | mean_abs_ig | mean_signed_ig |
|-----------------|-------------|----------------|
| tp2             | 0.0155      | 0.0101         |
| phys_elec_therm | 0.0132      | 0.0132         |
| phys_pres_diff  | 0.0085      | -0.0085        |
| comp            | 0.0069      | 0.0019         |
| tp3             | 0.0050      | -0.0038        |
| h1              | 0.0047      | -0.0047        |
| mpg             | 0.0043      | -0.0043        |
| dv_electric     | 0.0040      | -0.0040        |
| reservoirs      | 0.0036      | -0.0036        |
| oil_temperature | 0.0036      | 0.0017         |
| motor_current   | 0.0035      | -0.0031        |
| oil_level       | 0.0023      | 0.0007         |
| dv_pressure     | 0.0020      | -0.0020        |
| phys_dv_inter   | 0.0018      | -0.0015        |
| caudal_impulses | 0.0012      | -0.0012        |
| lps             | 0.0006      | -0.0006        |
| towers          | 0.0004      | -0.0004        |
| pressure_switch | 0.0004      | -0.0003        |

Rendered from the copied supplementary CSV source retained with this project.

**Table S4** Supplementary table S3: pair-level IG attribution

| feat                  | mean_abs_ig | mean_signed_ig |
|-----------------------|-------------|----------------|
| torque_nm             | 0.0336      | -0.0271        |
| air_temperature_k     | 0.0318      | -0.0117        |
| type_L                | 0.0183      | -0.0183        |
| rotational_speed_rpm  | 0.0173      | 0.0156         |
| process_temperature_k | 0.0156      | 0.0011         |
| tool_wear_min         | 0.0153      | -0.0148        |
| type_M                | 0.0089      | -0.0089        |

Rendered from the copied supplementary CSV source retained with this project.

**Table S5** Supplementary table S4: pair-level IG attribution

| feat            | mean_abs_ig | mean_signed_ig |
|-----------------|-------------|----------------|
| motor_current   | 0.0438      | -0.0279        |
| reservoirs      | 0.0326      | -0.0058        |
| tp3             | 0.0320      | -0.0082        |
| tp2             | 0.0255      | -0.0061        |
| oil_level       | 0.0197      | -0.0054        |
| h1              | 0.0165      | -0.0030        |
| dv_electric     | 0.0155      | -0.0029        |
| caudal_impulses | 0.0142      | 0.0068         |
| oil_temperature | 0.0119      | -0.0100        |
| dv_pressure     | 0.0100      | -0.0100        |
| comp            | 0.0073      | -0.0072        |
| mpg             | 0.0072      | -0.0071        |
| lps             | 0.0015      | -0.0015        |
| towers          | 0.0011      | 0.0006         |
| pressure_switch | 0.0008      | -0.0002        |

Rendered from the copied supplementary CSV source retained with this project.

**Table S6** Supplementary table S5: pair-level IG attribution

| feat                  | mean_abs_ig | mean_signed_ig |
|-----------------------|-------------|----------------|
| air_temperature_k     | 0.0381      | -0.0350        |
| tool_wear_min         | 0.0222      | 0.0115         |
| process_temperature_k | 0.0213      | 0.0200         |
| rotational_speed_rpm  | 0.0169      | 0.0163         |
| torque_nm             | 0.0166      | -0.0033        |
| type_L                | 0.0110      | -0.0049        |
| type_M                | 0.0089      | -0.0050        |

Rendered from the copied supplementary CSV source retained with this project.

**Table S7** Supplementary table S6: pair-level IG attribution

| feat            | mean_abs_ig | mean_signed_ig |
|-----------------|-------------|----------------|
| reservoirs      | 0.0369      | -0.0202        |
| motor_current   | 0.0268      | -0.0085        |
| tp2             | 0.0211      | -0.0180        |
| comp            | 0.0197      | -0.0065        |
| tp3             | 0.0160      | -0.0007        |
| h1              | 0.0157      | 0.0072         |
| oil_level       | 0.0129      | -0.0031        |
| mpg             | 0.0111      | -0.0009        |
| dv_electric     | 0.0106      | 0.0008         |
| caudal_impulses | 0.0097      | 0.0057         |
| oil_temperature | 0.0088      | 0.0021         |
| towers          | 0.0042      | 0.0042         |
| dv_pressure     | 0.0039      | 0.0005         |
| pressure_switch | 0.0024      | -0.0023        |
| lps             | 0.0006      | 0.0003         |

Rendered from the copied supplementary CSV source retained with this project.

**Table S8** Supplementary table S7: pair-level IG attribution

| feat                  | mean_abs_ig | mean_signed_ig |
|-----------------------|-------------|----------------|
| air_temperature_k     | 0.0098      | -0.0026        |
| type_M                | 0.0088      | -0.0087        |
| tool_wear_min         | 0.0078      | -0.0078        |
| torque_nm             | 0.0064      | -0.0028        |
| rotational_speed_rpm  | 0.0043      | -0.0038        |
| type_L                | 0.0040      | 0.0002         |
| process_temperature_k | 0.0036      | 0.0006         |

Rendered from the copied supplementary CSV source retained with this project.

**Table S9** Supplementary table S8: pair-level IG attribution

| feat            | mean_abs_ig | mean_signed_ig |
|-----------------|-------------|----------------|
| oil_temperature | 0.0209      | 0.0095         |
| oil_level       | 0.0170      | -0.0116        |
| dv_electric     | 0.0156      | -0.0115        |
| caudal_impulses | 0.0119      | -0.0087        |
| tp2             | 0.0094      | 0.0072         |
| comp            | 0.0094      | 0.0075         |
| reservoirs      | 0.0090      | -0.0058        |
| mpg             | 0.0065      | -0.0044        |
| motor_current   | 0.0054      | -0.0026        |
| tp3             | 0.0042      | -0.0041        |
| h1              | 0.0032      | -8.85e-05      |
| dv_pressure     | 0.0017      | 0.0013         |
| pressure_switch | 0.0012      | 0.0012         |
| towers          | 0.0009      | -0.0005        |
| lps             | 0.0008      | 0.0008         |

Rendered from the copied supplementary CSV source retained with this project.

**Table S10** Supplementary table S9: pair-level IG attribution

| feat                  | mean_abs_ig | mean_signed_ig |
|-----------------------|-------------|----------------|
| air_temperature_k     | 0.0222      | 0.0222         |
| process_temperature_k | 0.0215      | -0.0010        |
| type_L                | 0.0090      | 0.0070         |
| type_M                | 0.0086      | 0.0086         |
| rotational_speed_rpm  | 0.0079      | 0.0074         |
| torque_nm             | 0.0050      | 0.0048         |
| tool_wear_min         | 0.0042      | 0.0042         |

Rendered from the copied supplementary CSV source retained with this project.

**Table S11** Supplementary table S10: pair-level IG attribution

| feat            | mean_abs_ig | mean_signed_ig |
|-----------------|-------------|----------------|
| comp            | 0.0297      | -0.0259        |
| tp3             | 0.0260      | -0.0260        |
| motor_current   | 0.0244      | -0.0055        |
| reservoirs      | 0.0183      | 0.0048         |
| mpg             | 0.0180      | -0.0180        |
| dv_electric     | 0.0179      | 0.0121         |
| oil_level       | 0.0178      | -0.0134        |
| oil_temperature | 0.0178      | -0.0050        |
| caudal_impulses | 0.0177      | 0.0060         |
| tp2             | 0.0147      | 6.83e-05       |
| h1              | 0.0145      | 0.0070         |
| towers          | 0.0097      | 0.0097         |
| dv_pressure     | 0.0053      | -0.0035        |
| pressure_switch | 0.0017      | 0.0011         |
| lps             | 0.0009      | -0.0005        |

Rendered from the copied supplementary CSV source retained with this project.

**Table S12** Supplementary table S11: pair-level IG attribution

| feat                  | mean_abs_ig | mean_signed_ig |
|-----------------------|-------------|----------------|
| torque_nm             | 0.0140      | -0.0084        |
| air_temperature_k     | 0.0132      | 0.0009         |
| type_L                | 0.0108      | -0.0002        |
| tool_wear_min         | 0.0048      | -3.09e-05      |
| process_temperature_k | 0.0043      | -0.0027        |
| type_M                | 0.0036      | -0.0020        |
| rotational_speed_rpm  | 0.0032      | 0.0023         |

Rendered from the copied supplementary CSV source retained with this project.

**Table S13** Supplementary table S12: pair-level IG attribution

| feat            | mean_abs_ig | mean_signed_ig |
|-----------------|-------------|----------------|
| dv_electric     | 0.0164      | -0.0137        |
| mpg             | 0.0162      | 0.0082         |
| reservoirs      | 0.0136      | -0.0057        |
| caudal_impulses | 0.0117      | -0.0054        |
| tp2             | 0.0115      | 0.0042         |
| oil_level       | 0.0098      | 0.0054         |
| motor_current   | 0.0092      | 0.0062         |
| tp3             | 0.0087      | -0.0042        |
| comp            | 0.0082      | 0.0020         |
| h1              | 0.0071      | -0.0044        |
| oil_temperature | 0.0067      | 0.0045         |
| towers          | 0.0021      | -0.0014        |
| dv_pressure     | 0.0019      | -0.0014        |
| pressure_switch | 0.0008      | 0.0004         |
| lps             | 0.0007      | 0.0007         |

Rendered from the copied supplementary CSV source retained with this project.

**Table S14** Supplementary table S13: pair-level IG attribution

| feat                  | mean_abs_ig | mean_signed_ig |
|-----------------------|-------------|----------------|
| type_L                | 0.0134      | -0.0030        |
| tool_wear_min         | 0.0061      | 0.0039         |
| air_temperature_k     | 0.0055      | 0.0008         |
| torque_nm             | 0.0054      | -0.0002        |
| type_M                | 0.0043      | -0.0008        |
| process_temperature_k | 0.0039      | -0.0023        |
| rotational_speed_rpm  | 0.0023      | -0.0022        |

Rendered from the copied supplementary CSV source retained with this project.

**Table S15** Supplementary table S14: pair-level IG attribution

| feat            | mean_abs_ig | mean_signed_ig |
|-----------------|-------------|----------------|
| caudal_impulses | 0.0262      | 0.0231         |
| tp3             | 0.0146      | 0.0054         |
| reservoirs      | 0.0126      | 0.0038         |
| h1              | 0.0091      | 0.0081         |
| oil_level       | 0.0084      | 0.0060         |
| comp            | 0.0075      | 0.0029         |
| motor_current   | 0.0058      | 0.0003         |
| dv_electric     | 0.0047      | -0.0005        |
| mpg             | 0.0042      | -0.0027        |
| towers          | 0.0036      | 0.0020         |
| oil_temperature | 0.0034      | -0.0005        |
| tp2             | 0.0033      | 0.0007         |
| dv_pressure     | 0.0017      | 0.0002         |
| pressure_switch | 0.0011      | -0.0010        |
| lps             | 0.0006      | -0.0003        |

Rendered from the copied supplementary CSV source retained with this project.

**Table S16** Supplementary table S15: pair-level IG attribution

| feat                  | mean_abs_ig | mean_signed_ig |
|-----------------------|-------------|----------------|
| air_temperature_k     | 0.0262      | 0.0143         |
| torque_nm             | 0.0099      | 0.0092         |
| tool_wear_min         | 0.0085      | 0.0029         |
| process_temperature_k | 0.0081      | 0.0079         |
| type_L                | 0.0075      | 0.0058         |
| type_M                | 0.0070      | -0.0036        |
| rotational_speed_rpm  | 0.0027      | 8.08e-05       |

Rendered from the copied supplementary CSV source retained with this project.

**Table S17** Supplementary table S16: pair-level IG attribution

| feat            | mean_abs_ig | mean_signed_ig |
|-----------------|-------------|----------------|
| reservoirs      | 0.0159      | 0.0156         |
| mpg             | 0.0133      | 0.0051         |
| dv_electric     | 0.0126      | 0.0106         |
| tp2             | 0.0115      | 0.0077         |
| oil_level       | 0.0089      | 0.0075         |
| oil_temperature | 0.0074      | -0.0065        |
| h1              | 0.0061      | -0.0017        |
| tp3             | 0.0061      | 0.0049         |
| motor_current   | 0.0050      | -0.0013        |
| towers          | 0.0035      | 0.0035         |
| comp            | 0.0035      | -0.0018        |
| caudal_impulses | 0.0027      | 0.0013         |
| dv_pressure     | 0.0022      | -0.0001        |
| pressure_switch | 0.0010      | 0.0007         |
| lps             | 0.0006      | 0.0006         |

Rendered from the copied supplementary CSV source retained with this project.

**Table S18** Supplementary table S17: pair-level IG attribution

| feat                  | mean_abs_ig | mean_signed_ig |
|-----------------------|-------------|----------------|
| process_temperature_k | 0.0362      | -0.0362        |
| torque_nm             | 0.0282      | -0.0196        |
| air_temperature_k     | 0.0209      | -0.0179        |
| tool_wear_min         | 0.0182      | -0.0179        |
| rotational_speed_rpm  | 0.0151      | -0.0149        |
| type_M                | 0.0117      | 0.0105         |
| type_L                | 0.0064      | -0.0005        |

Rendered from the copied supplementary CSV source retained with this project.

**Table S19** Supplementary table S18: pair-level IG attribution

| feat            | mean_abs_ig | mean_signed_ig |
|-----------------|-------------|----------------|
| reservoirs      | 0.0477      | -0.0122        |
| oil_level       | 0.0358      | 0.0112         |
| motor_current   | 0.0205      | -0.0205        |
| h1              | 0.0173      | -0.0173        |
| tp3             | 0.0159      | 0.0043         |
| caudal_impulses | 0.0126      | 0.0001         |
| mpg             | 0.0125      | 0.0019         |
| dv_electric     | 0.0113      | -0.0083        |
| oil_temperature | 0.0090      | -0.0019        |
| comp            | 0.0088      | -0.0067        |
| towers          | 0.0070      | 0.0066         |
| dv_pressure     | 0.0060      | -0.0060        |
| tp2             | 0.0052      | -0.0018        |
| pressure_switch | 0.0023      | -0.0013        |
| lps             | 0.0005      | 0.0002         |

Rendered from the copied supplementary CSV source retained with this project.

**Table S20** Supplementary table S19: validation and repair status log

| model                      | dataset | performance_status | reliability_status | interpretability_status |
|----------------------------|---------|--------------------|--------------------|-------------------------|
| AE classifier Lite         | A14I    | imported_primary   | fallback_local     | imported                |
| AE classifier Lite         | MetroPT | imported_primary   | fallback_local     | imported                |
| No-buffer ablation         | A14I    | fallback_local     | fallback_local     | computed_fallback       |
| No-buffer ablation         | MetroPT | fallback_local     | fallback_local     | imported_fallback_run   |
| No-gate ablation           | A14I    | imported_primary   | fallback_local     | imported                |
| No-gate ablation           | MetroPT | imported_primary   | fallback_local     | imported                |
| BufferEnsemble PhysicsGate | A14I    | imported_primary   | fallback_local     | imported                |
| BufferEnsemble PhysicsGate | MetroPT | imported_primary   | fallback_local     | imported                |
| PhysicsCrossGate ResMLP    | A14I    | imported_primary   | fallback_local     | imported                |
| PhysicsCrossGate ResMLP    | MetroPT | imported_primary   | fallback_local     | imported                |
| PhysicsGate AE classifier  | A14I    | imported_primary   | fallback_local     | imported                |
| PhysicsGate AE classifier  | MetroPT | imported_primary   | fallback_local     | imported                |
| PhysicsGate MLP            | A14I    | imported_primary   | fallback_local     | imported                |
| PhysicsGate MLP            | MetroPT | imported_primary   | fallback_local     | imported                |

Rendered from the copied supplementary CSV source retained with this project.

**Table S21** Supplementary table S20: validation status

| model                      | dataset | performance_status | reliability_status               | interpretability_status |
|----------------------------|---------|--------------------|----------------------------------|-------------------------|
| AE classifier Lite         | AI4I    | imported_primary   | fallback_local                   | imported                |
| AE classifier Lite         | MetroPT | imported_primary   | fallback_local                   | imported                |
| No-buffer ablation         | AI4I    | fallback_local     | fallback_local                   | computed_fallback       |
| No-buffer ablation         | MetroPT | fallback_local     | fallback_local                   | imported_fallback_run   |
| No-gate ablation           | AI4I    | imported_primary   | fallback_local                   | imported                |
| No-gate ablation           | MetroPT | imported_primary   | fallback_local                   | imported                |
| BufferEnsemble PhysicsGate | AI4I    | imported_primary   | fallback_local                   | imported                |
| BufferEnsemble PhysicsGate | MetroPT | imported_primary   | fallback_local                   | imported                |
| GRU Lite                   | AI4I    | imported_primary   | imported_primary_+<br>plus_local | imported                |
| GRU Lite                   | MetroPT | imported_primary   | imported_primary_+<br>plus_local | imported                |
| PhysicsCrossGate ResMLP    | AI4I    | imported_primary   | fallback_local                   | imported                |
| PhysicsCrossGate ResMLP    | MetroPT | imported_primary   | fallback_local                   | imported                |
| PhysicsGate AE classifier  | AI4I    | imported_primary   | fallback_local                   | imported                |
| PhysicsGate AE classifier  | MetroPT | imported_primary   | fallback_local                   | imported                |
| PhysicsGate MLP            | AI4I    | imported_primary   | fallback_local                   | imported                |
| PhysicsGate MLP            | MetroPT | imported_primary   | fallback_local                   | imported                |
| ResMLP Lite                | AI4I    | imported_primary   | imported_primary_+<br>plus_local | imported                |
| ResMLP Lite                | MetroPT | imported_primary   | imported_primary_+<br>plus_local | imported                |

Rendered from the copied supplementary CSV source retained with this project.

## S5 Supplementary visual artefacts

The following figures reproduce the uploaded pair-level IG visual artefacts retained in `supplementary_assets/figures/`. They are included to make the attribution-supported framework discussion inspectable. The numerical attribution values are reported in Tables [S2–S19](#), and the validation status is reported in Tables [S20–S21](#).

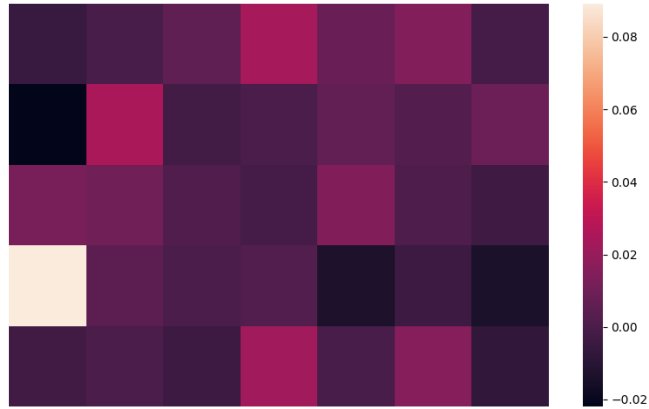

**Fig. S1** Supplementary pair-level IG visual artefact 1. The corresponding pair-level numerical values are provided in the supplementary tables and validation records.

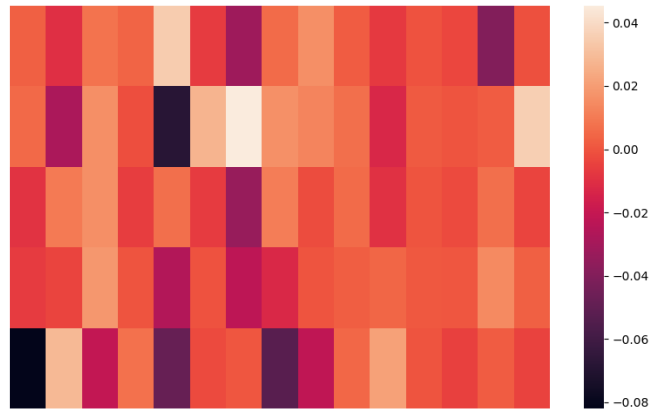

**Fig. S2** Supplementary pair-level IG visual artefact 2. The corresponding pair-level numerical values are provided in the supplementary tables and validation records.

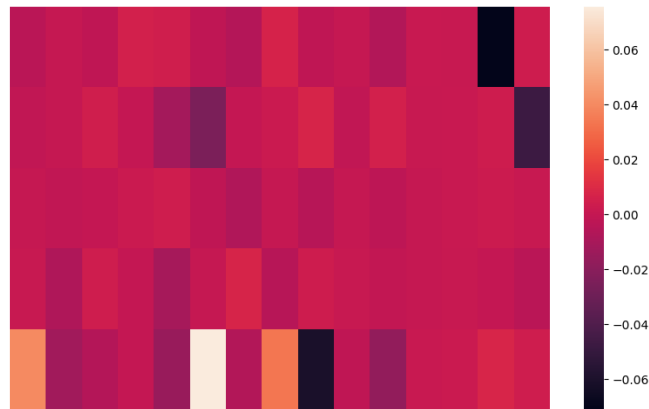

**Fig. S3** Supplementary pair-level IG visual artefact 3. The corresponding pair-level numerical values are provided in the supplementary tables and validation records.

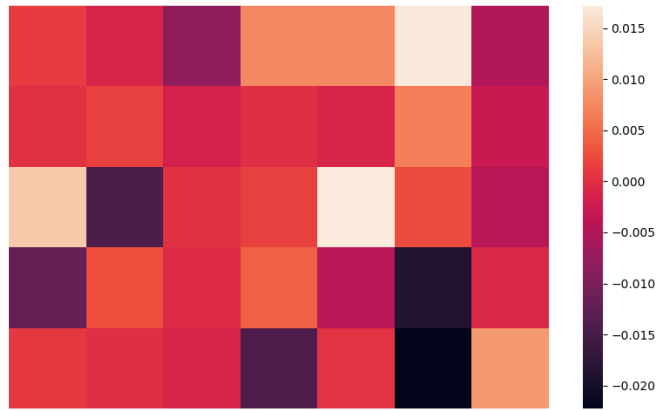

**Fig. S4** Supplementary pair-level IG visual artefact 4. The corresponding pair-level numerical values are provided in the supplementary tables and validation records.

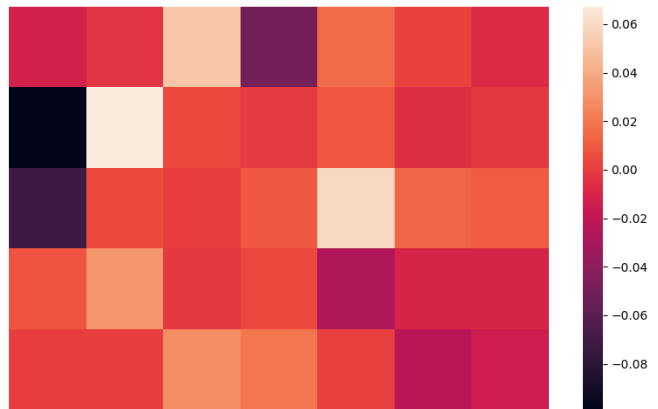

**Fig. S5** Supplementary pair-level IG visual artefact 5. The corresponding pair-level numerical values are provided in the supplementary tables and validation records.

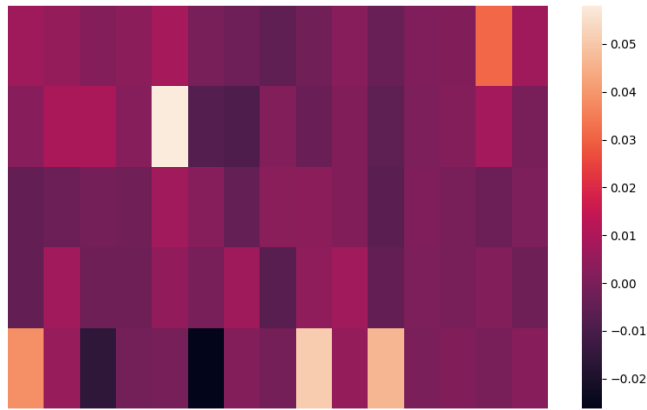

**Fig. S6** Supplementary pair-level IG visual artefact 6. The corresponding pair-level numerical values are provided in the supplementary tables and validation records.

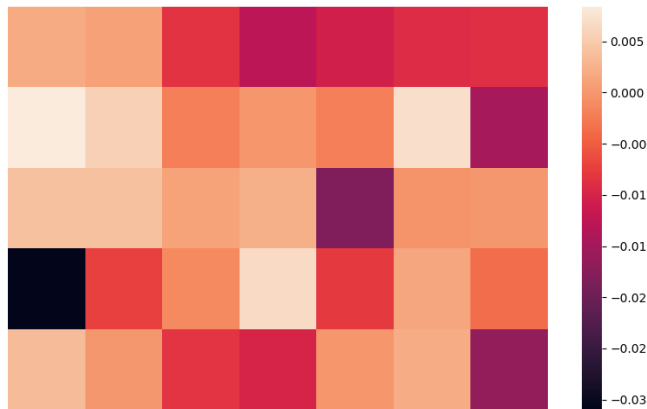

**Fig. S7** Supplementary pair-level IG visual artefact 7. The corresponding pair-level numerical values are provided in the supplementary tables and validation records.

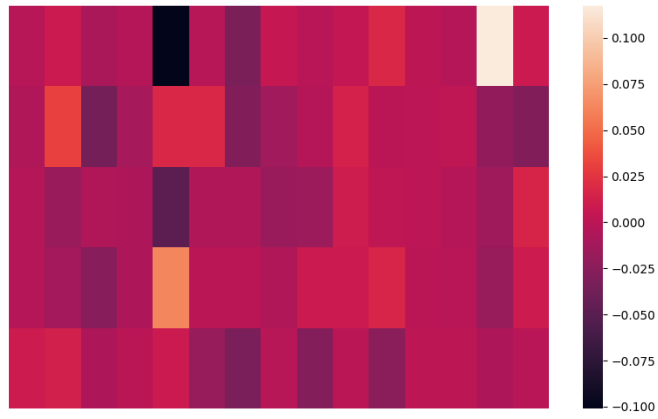

**Fig. S8** Supplementary pair-level IG visual artefact 8. The corresponding pair-level numerical values are provided in the supplementary tables and validation records.

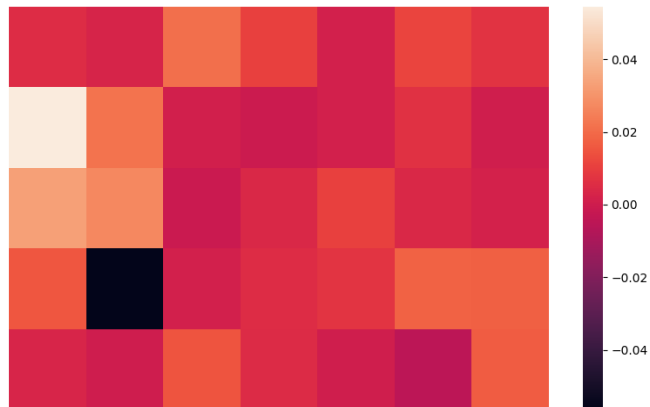

**Fig. S9** Supplementary pair-level IG visual artefact 9. The corresponding pair-level numerical values are provided in the supplementary tables and validation records.

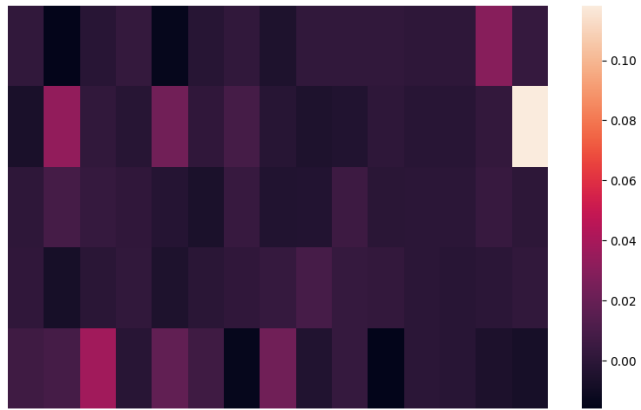

**Fig. S10** Supplementary pair-level IG visual artefact 10. The corresponding pair-level numerical values are provided in the supplementary tables and validation records.

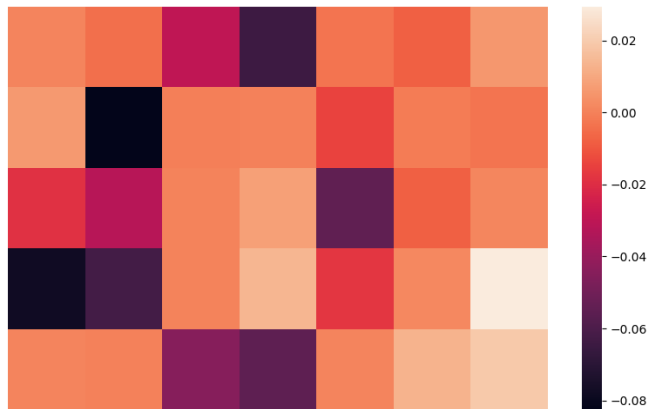

**Fig. S11** Supplementary pair-level IG visual artefact 11. The corresponding pair-level numerical values are provided in the supplementary tables and validation records.

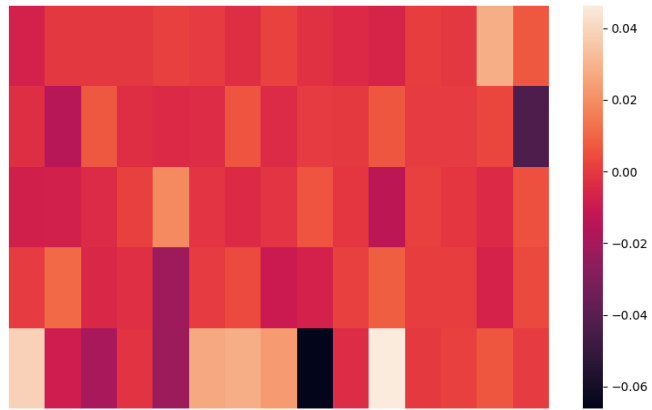

**Fig. S12** Supplementary pair-level IG visual artefact 12. The corresponding pair-level numerical values are provided in the supplementary tables and validation records.

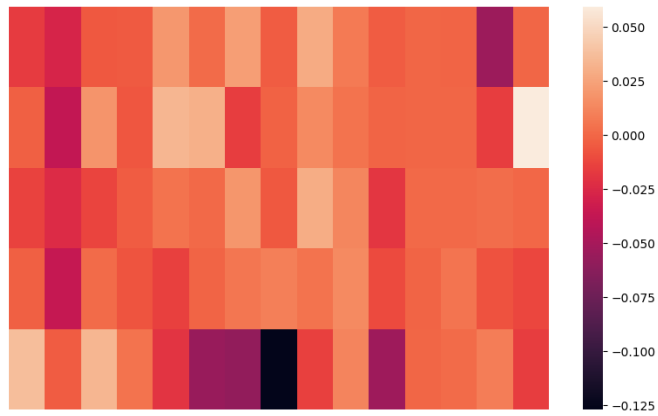

**Fig. S13** Supplementary pair-level IG visual artefact 13. The corresponding pair-level numerical values are provided in the supplementary tables and validation records.

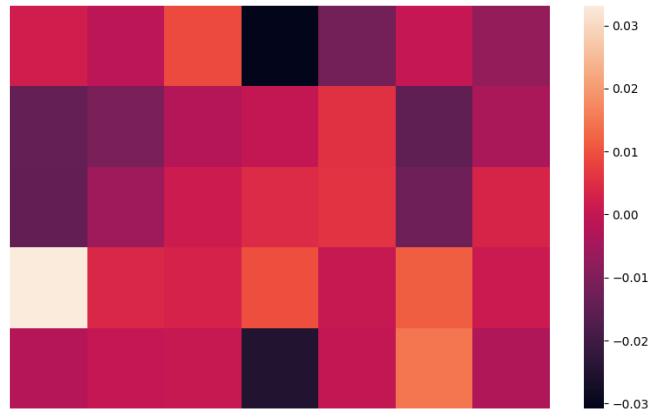

**Fig. S14** Supplementary pair-level IG visual artefact 14. The corresponding pair-level numerical values are provided in the supplementary tables and validation records.

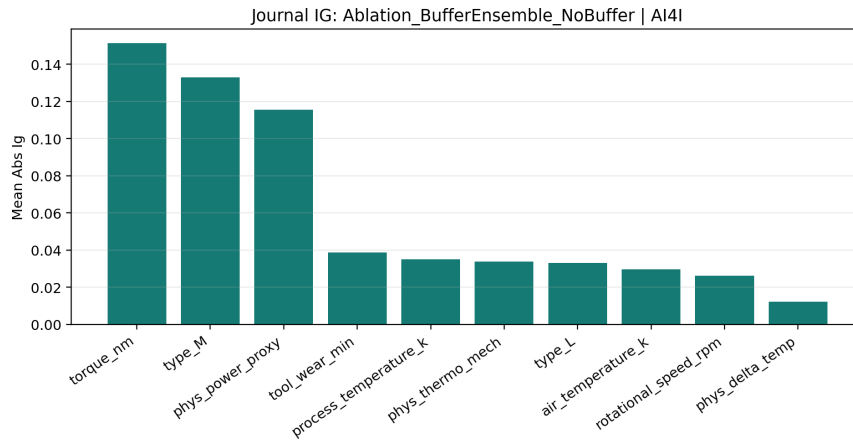

**Fig. S15** Supplementary pair-level IG visual artefact 15. The corresponding pair-level numerical values are provided in the supplementary tables and validation records.

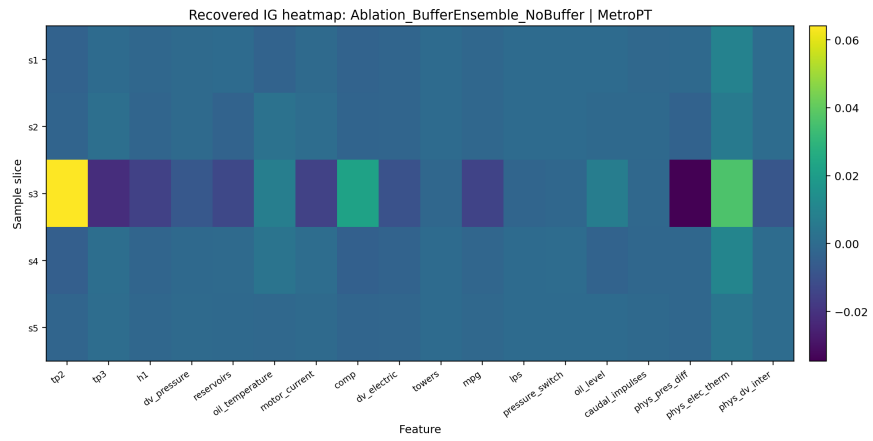

**Fig. S16** Supplementary pair-level IG visual artefact 16. The corresponding pair-level numerical values are provided in the supplementary tables and validation records.

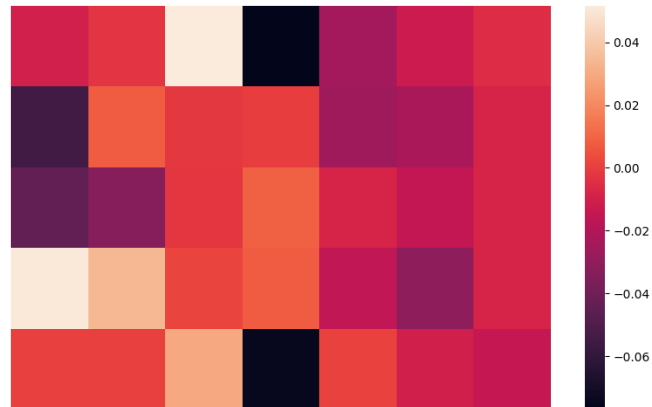

**Fig. S17** Supplementary pair-level IG visual artefact 17. The corresponding pair-level numerical values are provided in the supplementary tables and validation records.

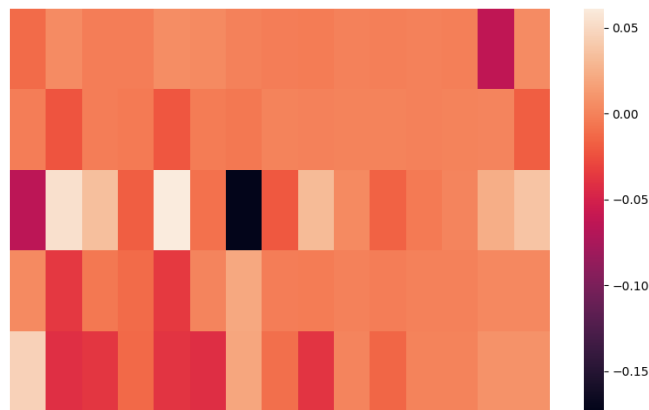

**Fig. S18** Supplementary pair-level IG visual artefact 18. The corresponding pair-level numerical values are provided in the supplementary tables and validation records.

## S6 Supplementary data arrays, validation files, and artefact trail

The following IG data arrays are included where present:

- supplementary\_assets/data/journal\_freeze\_appendix\_ig\_data\_No-bufferablation\_AI4I.npy
- supplementary\_assets/data/journal\_freeze\_appendix\_ig\_data\_No-bufferablation\_MetroPT.npy
- supplementary\_assets/data/journal\_freeze\_appendix\_ig\_data\_No-gateablation\_AI4I.npy
- supplementary\_assets/data/journal\_freeze\_appendix\_ig\_data\_No-gateablation\_MetroPT.npy
- supplementary\_assets/data/journal\_freeze\_appendix\_ig\_data\_AEclassifierLite\_AI4I.npy
- supplementary\_assets/data/journal\_freeze\_appendix\_ig\_data\_AEclassifierLite\_MetroPT.npy
- supplementary\_assets/data/journal\_freeze\_appendix\_ig\_data\_BufferEnsemblePhysicsGate\_AI4I.npy
- supplementary\_assets/data/journal\_freeze\_appendix\_ig\_data\_BufferEnsemblePhysicsGate\_MetroPT.npy
- supplementary\_assets/data/journal\_freeze\_appendix\_ig\_data\_GRULite\_AI4I.npy
- supplementary\_assets/data/journal\_freeze\_appendix\_ig\_data\_GRULite\_MetroPT.npy

- supplementary\_assets/data/journal\_freeze\_appendix\_ig\_data\_PhysicsCrossGateResMLP\_AI4I.npy
- supplementary\_assets/data/journal\_freeze\_appendix\_ig\_data\_PhysicsCrossGateResMLP\_MetroPT.npy
- supplementary\_assets/data/journal\_freeze\_appendix\_ig\_data\_PhysicsGateAEclassifier\_AI4I.npy
- supplementary\_assets/data/journal\_freeze\_appendix\_ig\_data\_PhysicsGateAEclassifier\_MetroPT.npy
- supplementary\_assets/data/journal\_freeze\_appendix\_ig\_data\_PhysicsGateMLP\_AI4I.npy
- supplementary\_assets/data/journal\_freeze\_appendix\_ig\_data\_PhysicsGateMLP\_MetroPT.npy
- supplementary\_assets/data/journal\_freeze\_appendix\_ig\_data\_ResMLPLite\_AI4I.npy
- supplementary\_assets/data/journal\_freeze\_appendix\_ig\_data\_ResMLPLite\_MetroPT.npy

The following validation files are included:

- supplementary\_assets/validation/journal\_freeze\_smoke.txt
- supplementary\_assets/validation/journal\_freeze\_validation\_status.csv

If a separate manifest file is included in the submitted supplementary package, it should be read as an index to the same artefact trail rather than as an additional source of results. The validation files and data-array references listed above remain the primary supplementary records for the framework release.

## S7 Scope of interpretation

The supplementary evidence supports the balanced interpretation used in the main paper. The framework shows that compact models can perform strongly, particularly on MetroPT, and that residual and recurrent baselines are important comparators. It also shows that perturbation sensitivity remains a meaningful limitation. The IG artefacts help make model behaviour inspectable, but they should be treated as supportive attribution evidence rather than causal proof. This interpretation keeps the framework optimistic, transparent, and appropriately bounded for journal review.
